# Supplementary material for: Preeclampsia Correlates with an Increase in Cannabinoid Receptor 1 Levels Leading to Macromolecular Alterations in Chorionic Villi of Term Placenta
Source: MDPI journal article supplement (doi:10.3390/ijms232112931), 2022-10-26
Supplement: s1 [file s1]

# Preeclampsia Correlates with an Increase in Cannabinoid Receptor 1 Levels Leading to Macromolecular Alterations in Chorionic Villi of Term Placenta

Marta Lombó <sup>1,2,†</sup>, Christian Giommi <sup>1,†</sup>, Michela Paolucci <sup>3</sup>, Valentina Notarstefano <sup>1</sup>, Nina Montik <sup>3</sup>, Giovanni Delli Carpini <sup>3</sup>, Andrea Ciavattini <sup>3</sup>, Antonio Ragusa <sup>4</sup>, Francesca Maradonna <sup>1,5,\*</sup>, Elisabetta Giorgini <sup>1</sup> and Oliana Carnevali <sup>1,5,\*</sup>

<sup>1</sup> Department of Life and Environmental Sciences, Università Politecnica delle Marche, 60131 Ancona, Italy

<sup>2</sup> Department of Molecular Biology, Faculty of Biology and Environmental Sciences, Universidad de León, 24071 León, Spain

<sup>3</sup> Department of Odontostomatological and Specialized Clinical Sciences, Università Politecnica delle Marche, 60020 Ancona, Italy

<sup>4</sup> Department of Obstetrics and Gynecology, Università Campus Bio Medico di Roma, 00128 Roma, Italy

<sup>5</sup> INBB—Consorzio Interuniversitario di Biosistemi e Biostrutture, 00136 Roma, Italy

\* Correspondence: f.maradonna@staff.univpm.it (F.M.); o.carnevali@staff.univpm.it (O.C.)

† These authors contributed equally to this work.

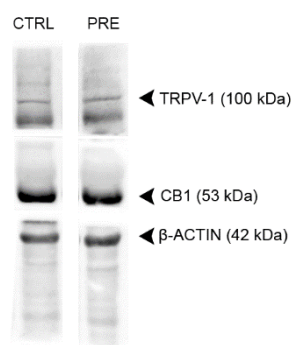

**Figure S1. Representative experiment of western blot.** Densitometric analysis of the band gray levels of CB1 (53 kDa) and TRPV-1 (100 kDa) in CTRL and PRE samples was performed using  $\beta$ -ACTIN (42 kDa) as internal control.
